# Supplementary material for: Electrocatalysis at Co–poly(difluoropyrrole) electrodeposited on Vulcan carbon supports: demonstration of halogenated polypyrrole as an electrocatalytic material
Source: Royal Society of Chemistry journal article supplement (doi:10.1039/c1jm10393h), 2011-01-01
Supplement: c1jm10393h.pdf [file c1jm10393h.pdf]

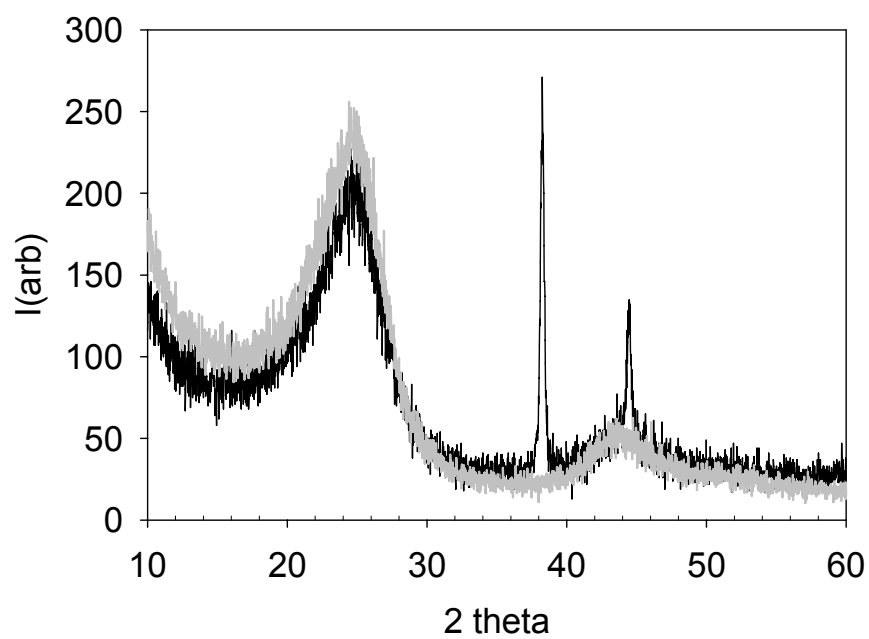

**Fig. S1** X-ray diffraction pattern for Co-poly(dfp)/VC sample F2 (black) and VC (gray) The sharp features at  $2\theta = 38^\circ$  and  $2\theta = 45^\circ$  are due to metallic Au contamination in Co-poly(dfp)/VC.

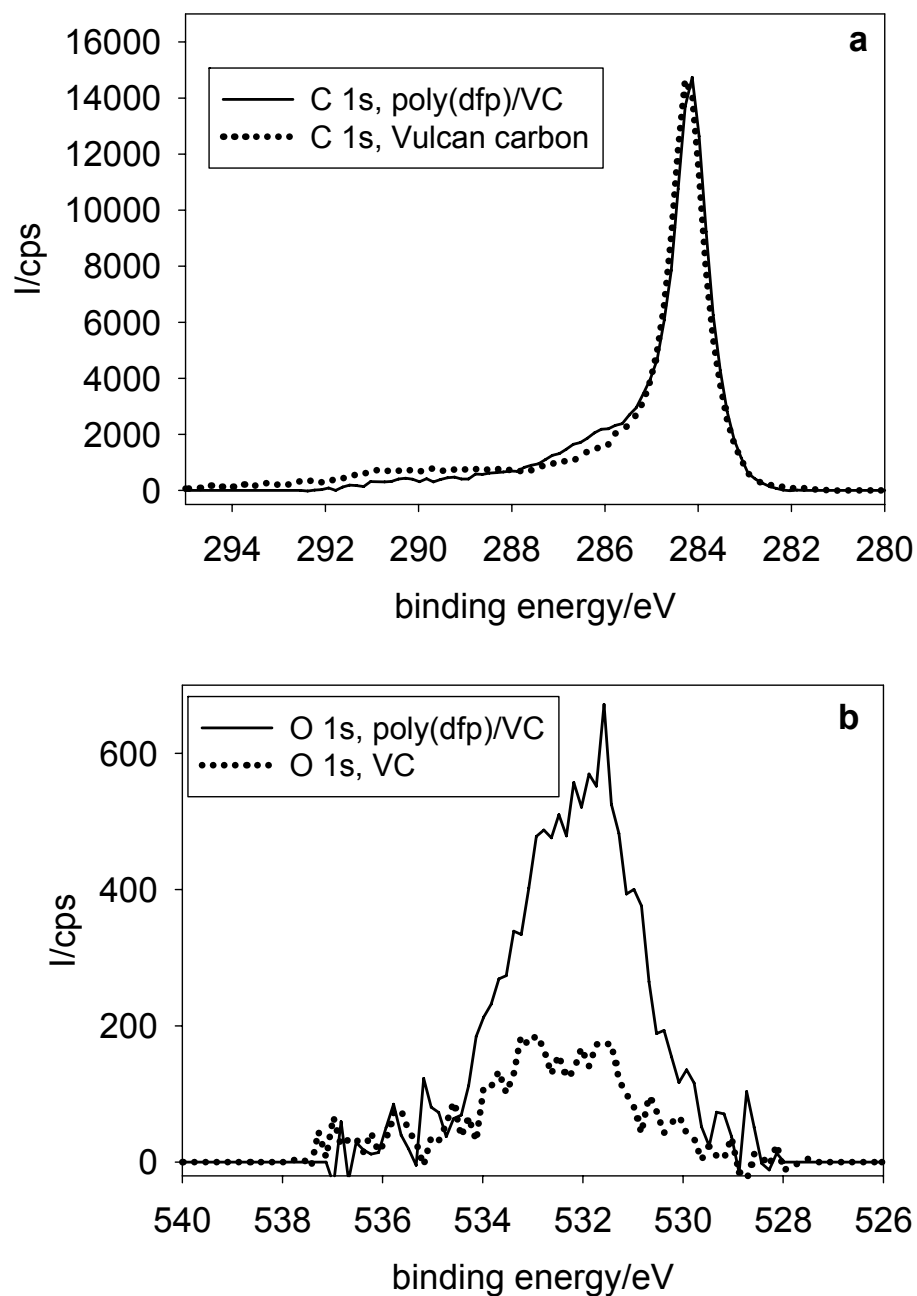

**Fig. S2** High-resolution X-ray photoelectron spectra of poly(dfp)/VC sample F2 and Vulcan carbon in both the (a) C 1s and (b) O 1s regions of the spectrum.

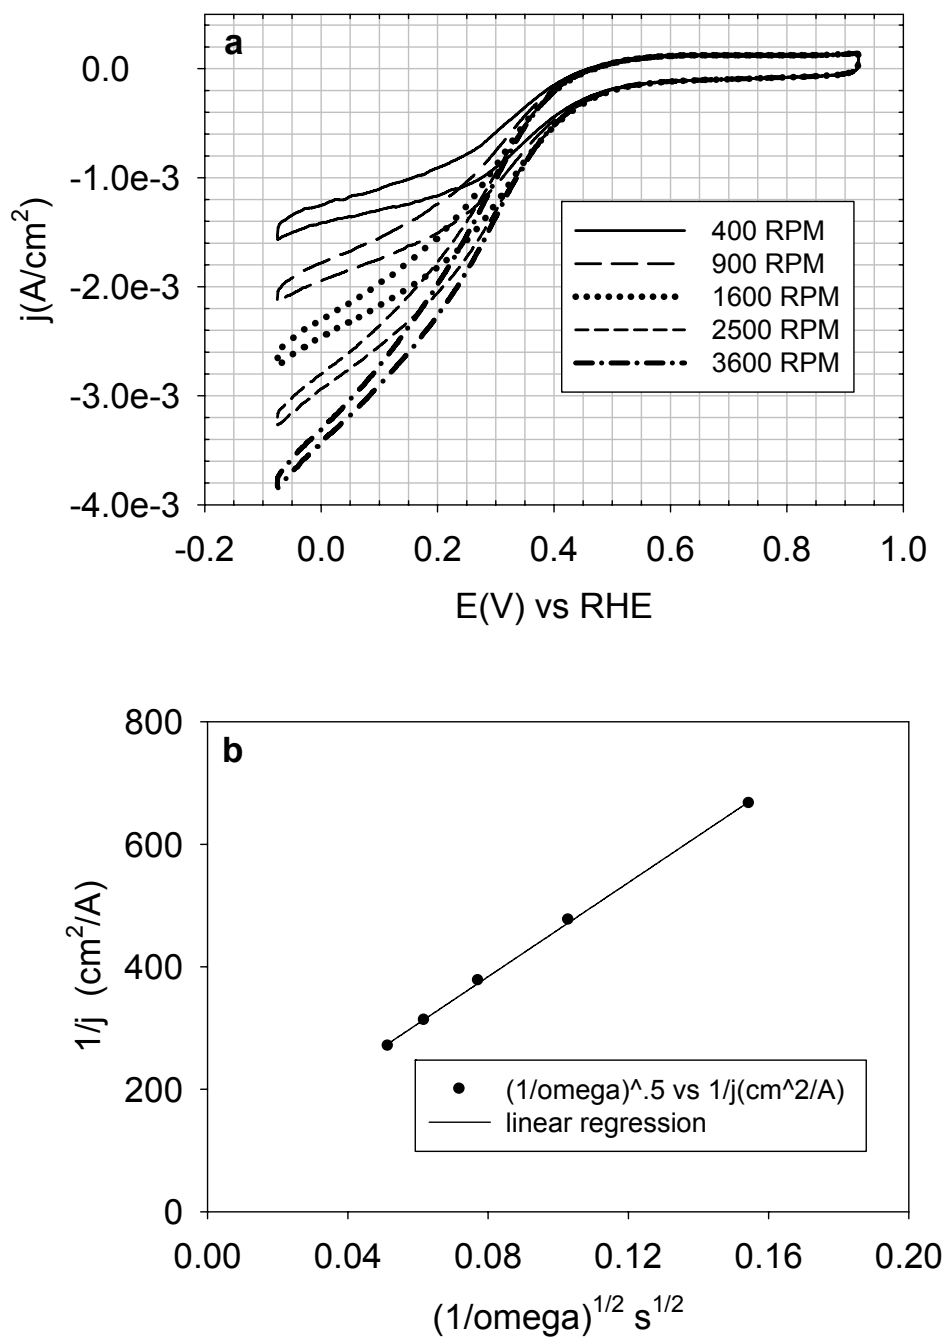

**Fig. S3** (a) Rotating disk voltammetry Co-poly(dfp)/VC films on 0.196 cm<sup>2</sup> glassy carbon disk electrodes in sat'd O<sub>2</sub>/0.1 M HClO<sub>4</sub> (aq) at rotation rates of 400–3600 rpm. (b) Koutecky-Levich plot of data from (a) taken at the negative limit of the voltammetric scan, yielding a value of  $n = 1.4$ .

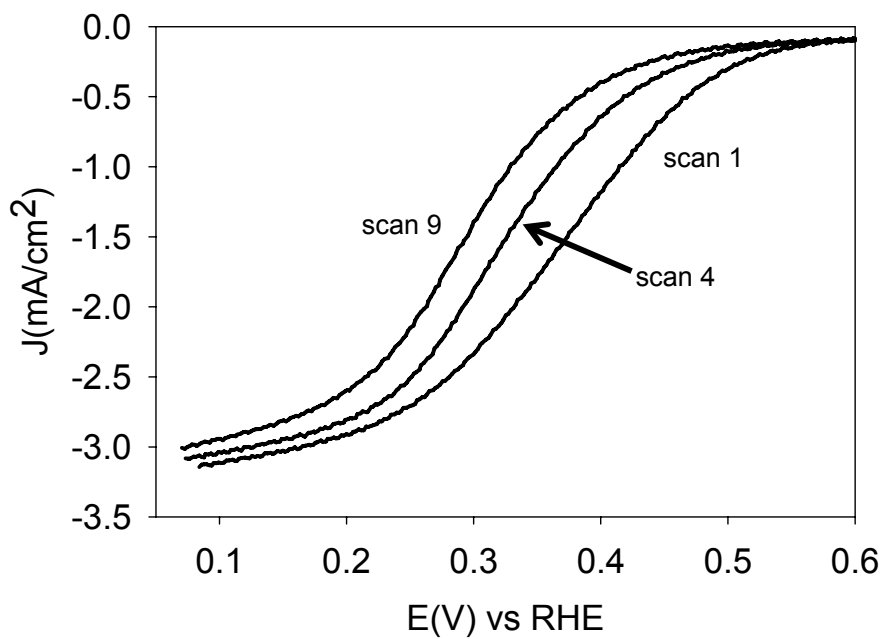

**Fig. S4** Rotating disk voltammetry of Nafion™-bound Co-poly(dfp)/VC films on  $0.196 \text{ cm}^2$  glassy carbon disk electrodes in sat'd  $\text{O}_2/0.1 \text{ M HClO}_4$  (aq) showing several consecutive scans. For clarity, only the negative-going sweeps are shown. Scan rate =  $50 \text{ mV/s}$ ; Rotation rate =  $1600 \text{ RPM}$ .

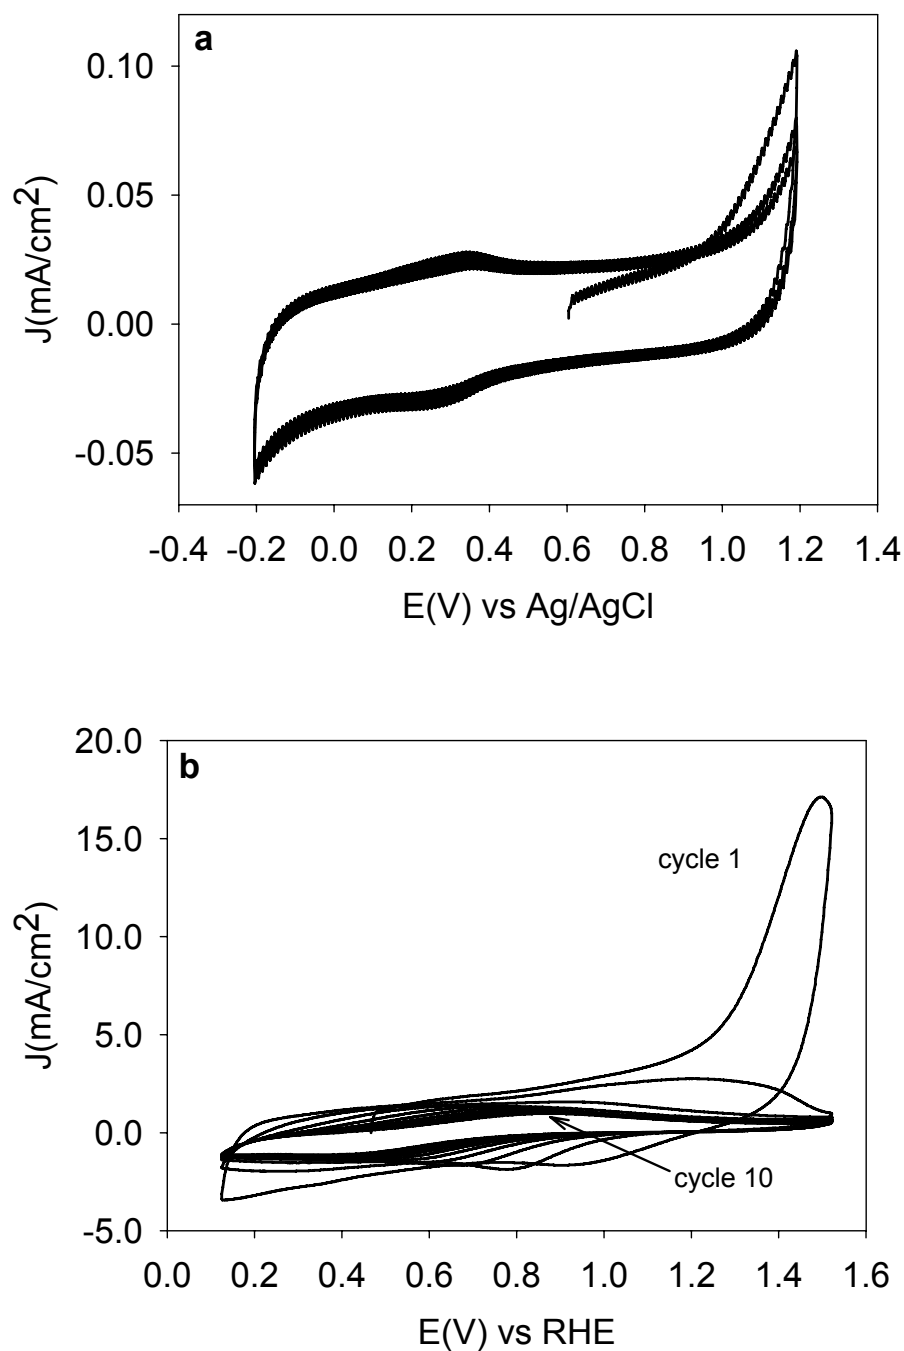

**Fig. S5** Cyclic voltammetry of (a) poly(dfp) and (b) ppy films on 0.071 cm<sup>2</sup> glassy carbon disk electrodes in sat'd Ar/0.1 M HClO<sub>4</sub> (aq), showing 10 consecutive voltammetric sweeps. Scan rate = 100 mV/s.
